# Supplementary material for: Seroprevalence of SARS-CoV-2 IgG Antibodies and Factors Associated with SARS-CoV-2 IgG Neutralizing Activity among Primary Health Care Workers 6 Months after Vaccination Rollout in France
Source: MDPI journal article supplement (doi:10.3390/v14050957), 2022-05-03
Supplement: s1 [file s1]

## Supplementary Material

**Table S1.** Name of the vaccine received by the PHCWs ( $N = 1612$ ; COVID-SéroPRIM study, France, 2021).

| Vaccine name                                 | <i>n</i> | %    |
|----------------------------------------------|----------|------|
| One dose ( $N = 186$ )                       |          |      |
| BNT162b2                                     | 122      | 65.6 |
| AZD1222                                      | 38       | 20.4 |
| mRNA-1273                                    | 22       | 11.8 |
| Ad26.COV2.S                                  | 4        | 2.1  |
| Two doses ( $N = 1277$ )                     |          |      |
| BNT162b2 $\times$ 2                          | 901      | 70.6 |
| AZD1222 $\times$ BNT162b2                    | 262      | 20.5 |
| Others                                       | 114      | 8.9  |
| Three doses ( $N = 2$ )                      |          |      |
| BNT162b2 $\times$ 3                          | 1        | 50.0 |
| AZD1222 $\times$ BNT162b2 $\times$ mRNA-1273 | 1        | 50.0 |
| NA                                           | 15       |      |
